# Supplementary material for: Two new species of Parahesione (Annelida: Hesionidae) associated with ghost shrimps (Crustacea: Decapoda) and their phylogenetic relationships
Source: PeerJ. 2023 Nov 1;11:e16346. doi: 10.7717/peerj.16346 (PMC10625355; doi:10.7717/peerj.16346)
Supplement: Supplemental Information 3 [file peerj-11-16346-s003.xlsx]

## Sheet: Sheet1
Supplementary file
Parahesione aviculata_COI	TATAAGTTGTTGATTCGGGCAGAATTGGGGCAGCCTGGAGCTTATTGGTAGAGATCAGCTGTATAATAGAATTGTAACGGCTCATGCTTTTTTAATGATTTTCTTTTTAGTTATGCCTGTAATAATGGGGGGATTTGGTAATTGATTAATTCCTTTAATGTTGGGAGGACCTGATATGGTATTTCCTCGAATGAATAACATGAGGTTTTGATTATTACCTCCTGCCTTAATTATGTTGGTGAGGTCTGCTGTGGTTGAGAAGGGTGCAGGGACTGGATGGACGGTTTATCCTCCTCTTTCTAGGAATATTGCTCATGCTGGACCTTCTGTGGATTTTGCTATTTTTTCTTTGCATTTGGCTGGGATTTCTTCAATTTTGGCTTCTATTAATTTTATTAG…
Parahesione aviculata_16S	GCCCGGTGAATTAGGTTTTAACGGCTGCGGTATCTTGACCGTGCAAAGGTAGCGTAATCCATTGCCTTTTAATTGTAGGCTTGTATGAATGTATGAACGAGGGATAGATTGTCTCAAGTTTCTTTGTATAAATTAAATTCTAGGTGAAGATGCCTAGATTAATCCAAAAGACAAGAAGACCCTATTGAGTTTTACTTTATGTCTTGGGTTTATTGATTAATAATGTATAATGGAAGAGATTAGAGTTTGGTTGGGGAGACTAAGGAACTAAGTTATCTTCCTTGAATTTAAGAAATGTTTCAATAAATGATCCTTTGAAGATCTTAAGAATAAATTACCATAGGGGTAACAGGCTTATTTTTCCAGAGAGTTCATATTGACGGGAAAGATTGGCACCTC…
Parahesione aviculata_28S	ACGGCGAGTGAAGCGGGAAGAGCCCAGCACCGAATCCCCTGCCGACAGGTAGCGGGACCTGTGGTGTTTAGGACAGCCTATGGGGCGAGTTCGGACGTCTGAGTCCTCCTGATCGGGCCTTTCCCATAGCGGGTGTCAGGCCTCTAATGGCGACCGTCGTCTCCCCTCTGAGCGTCCTTGGAGTCGGGTTGTTTGGGAATGCAGCCCAAAGTGGGTGGTAAACTCCATCTAAGGCTAAATACAGACACGTGTCCGATAGCGGACAAGTACCGTGAGGGAAAGTTGAAAAGAACTTTGAAGAGAGAGTTCAAGAGTACGTGAAACCGTTTAGAGGTAAACGGATGGGACCGCAAAGTCGACCGGAGGAATTCAACCCTGGGTCCGAGGGTGGCGGTGGTG…
Parahesione pulvinata_COI	AAATCATAAAGATATTGTAACATTATATTTTATTTTCGGGACTTGGTCTGGGTTACTTGGGACTTCTATAAGGTTATTGATTCGAGCAGAGTTAGGACAGCCTGGATCTTTATTGGGTAGAGACCAGTTATATAATAGGATTGTAACAGCACATGCTTTTTTGATAATTTTCTTTTTGGTTATGCCTGTGATGATGGGGGGTTTTGGTAATTGGTTGGTTCCTTTAATGTTGGGGGGTCCTGATATGGTATTTCCTCGAATGAATAATATGAGGTTTTGATTGTTGCCTCCTGCGTTAATTATGTTGGTGAGATCGGCTGTGGTTGAGAAAGGGGCAGGGACTGGGTGAACAGTTTATCCACCTCTTTCTAGGAATATTGCTCATGCTGGACCTTCTGT…
Parahesione pulvinata_16S	TCGCCTGTTTATCAAAAACATTGCTTTTCGATAGTGAAATGAAAAGTATGTCCTGCCCGGTGAATTAAGGTTTTAACGGCTGCGGTATCTTGACCGTGCAAAGGTAGCGTAATCCATTGCCTTTTAATTGTAGGCTTGTATGAATGTATGAACGAGGGATAAATTGTCTCAAGTTTCTTTAGTATAAATTAAATTCTAGGTGAAGATGCCTAGATTAATCCAAAAGACAAGAAGACCCTATTGAGTTTTACTTTATATCTTGGTGTTTATTGATTTAATAATGTGATAATGGGAGGGATTACAGTTTGGTTGGGGAGACTAAGGAACTGAATTATCTTCCTTGAATTTGAGAGTGTACTTCAGATAAAAGATCCTTTGAAGATCTTGAGAATAAATTAC…
Parahesione pulvinata_18S	TGCATGTCTCTGTACAAACTTTGACACAGTGAAACCGCGAATGGCTCATTAAATCAGTTATGGTTCCTTAGATCGTACACTCCTACTTGGATAACTGTGGCAATTCTAGAGCTAATACATGCAACCAAGCTCCGCCCTTCGCGGGAAGAGCGCTTTTATTAGATCAAGACCAATCGCGTCCTCGTGACGTGTCCCATTGGTGACTCTGGATAACTTTGAGCTGATCGCATGGCCTCGAGCCGGCGACGTATCTTTCAAATGTCTGCCCTATCAACTTTCGAAGGTACTCGATATGACTACCTTGGTTGTAACGGGTAACGGGGAATCAGGGTTCGATTCCGGAGAGGGAGCATGAGAAACGGCTACCACATCCAAGGAAGGCAGCAGGCGCGCAAATTA…
Parahesione pulvinata_28S	TAGTAACGGCGAGTGAAGCGGGAAGAGCCCAGCACCGAATCCCCTGCCGACAGGTAGCGGGACCTGTGGTGTTTAGGACAGCCTATGGGGCGACGTTCGGACGTCCGAGTCCTCCTGATCGGGGCCTTTCCCATAGCGGGTGTCAGGCCTCTAATGGCGACCGTCGTCTCCCCTCTGAGCGTCCTTGGAGTCGGGTTGTTTGGGAATGCAGCCCAAAGTGGGTGGTAAACTCCATCTAAGGCTAAATACAGACACGTGTCCGATAGCGGACAAGTACCGTGAGGGAAAGTTGAAAAGAACTTTGAAGAGAGAGTTCAAGAGTACGTGAAACCGTTTAGAGGTAAACGGATGGGACCGCAAAGTCGACCGGAGGAATTCAACCCTGGGTCCGAGGGTGGC…
